# Supplementary material for: Bifidobacterium longum subsp. longum relieves loperamide hydrochloride-induced constipation in mice by enhancing bile acid dissociation
Source: Royal Society of Chemistry journal article supplement (doi:10.1039/d4fo04660a), 2024-12-13
Supplement: d4fo04660a1.pdf [file d4fo04660a1.pdf]

## Supplementary materials

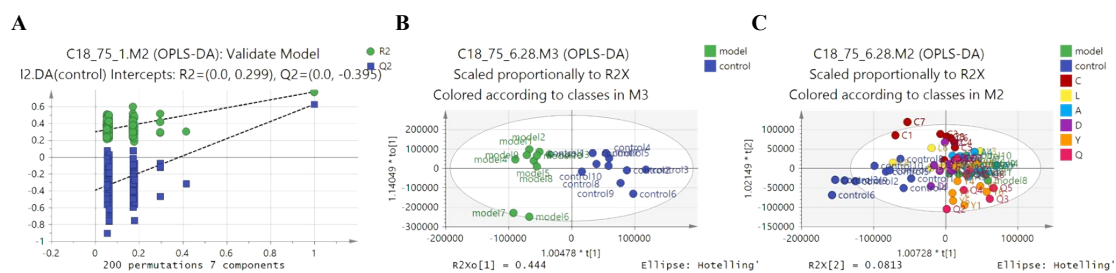

**Figure S1.** The effects of different *Bifidobacterium* species on nontargeted metabolomics in constipated mice. (A) Permutation test of control vs model. (B) PCA of control vs model. (C) PCA of different groups.
